# Supplementary material for: Stratification of Sepsis Patients on Admission into the Intensive Care Unit According to Differential Plasma Metabolic Phenotypes
Source: PubMed Central journal article supplement — J Proteome Res. 2024 Mar 21;23(4):1328–40. doi: 10.1021/acs.jproteome.3c00803 (PMC11002934; doi:10.1021/acs.jproteome.3c00803), 2024-03-21
Supplement: pr3c00803_si_001.pdf [file pr3c00803_si_001.pdf]

## **Stratification of sepsis patients on admission into the Intensive Care Unit according to differential plasma metabolic phenotypes**

Samantha Lodge<sup>1,2</sup>, Edward Litton<sup>3,4,5\*</sup>, Nicola Gray<sup>1,2</sup>, Monique Ryan<sup>1,2</sup>, Oscar Millet<sup>6</sup>, Mark Fear<sup>7,8</sup>, Edward Raby<sup>9</sup>, Andrew Currie<sup>10,11,12</sup>, Fiona Wood<sup>7,8,13</sup>, Elaine Holmes<sup>2,14</sup>, Julien Wist<sup>1,2,15,16\*</sup>, Jeremy K. Nicholson<sup>1,16\*</sup>

<sup>1</sup>*Australian National Phenome Center, Health Futures Institute, Murdoch University, Harry Perkins Building, Perth, WA6150, Australia.*

<sup>2</sup>*Center for Computational and Systems Medicine, Health Futures Institute, Murdoch University, Harry Perkins Building, Perth, WA6150, Australia.*

<sup>3</sup>*Intensive Care Unit, Fiona Stanley Hospital, Murdoch, WA6150, Australia.*

<sup>4</sup>*Intensive Care Unit, St John of God Hospital, Subiaco, WA6009, Australia.*

<sup>5</sup>*School of Medicine, University of Western Australia, Crawley, WA6009, Australia.*

<sup>6</sup>*Precision Medicine and Metabolism Laboratory, CIC bioGUNE, Parque Tecnológico de Bizkaia, Bld. 800, 48160, Derio, Spain.*

<sup>7</sup>*Burn Injury Research Unit, School of Biomedical Sciences, University of Western Australia, Perth, WA6009, Australia.*

<sup>8</sup>*Fiona Wood Foundation, Perth, WA6150, Australia.*

<sup>9</sup>*Department of Infectious Diseases, Fiona Stanley Hospital, Murdoch, WA6150, Australia.*

<sup>10</sup>*School of Medical, Molecular & Forensic Sciences, Murdoch University, Perth, WA6150, Australia*

<sup>11</sup>*Centre for Molecular Medicine & Innovative Therapeutics, Murdoch University, Perth, WA6150, Australia*

<sup>12</sup>*Wesfarmers Centre for Vaccines and Infectious Diseases, Telethon Kids Institute, University of Western Australia, Perth, WA6009, Australia*

<sup>13</sup>*Burns service of Western Australia, WA Department of Health, Murdoch, WA6150, Australia.*

<sup>14</sup>*Institute of Global Health Innovation, Faculty of Medicine, Imperial College London, Level 1, Faculty Building, South Kensington Campus, London, SW7 2NA, UK.*

<sup>15</sup>Chemistry Department, Universidad del Valle, 76001, Cali, Colombia.

<sup>16</sup>Department of Metabolism, Digestion and Reproduction, Faculty of Medicine, Imperial College London, Sir Alexander Fleming Building, South Kensington, London SW7 2AZ, UK

\*Correspondence to:

Edward Litton [ed.litton@hotmail.com](mailto:ed.litton@hotmail.com)

Jeremy Nicholson [Jeremy.Nicholson@murdoch.edu.au](mailto:Jeremy.Nicholson@murdoch.edu.au)

Julien Wist [Julien.Wist@murdoch.edu.au](mailto:Julien.Wist@murdoch.edu.au)

**Key words:** ICU, Sepsis, septic shock, NMR spectroscopy, mass spectrometry,pharmaco-metabonomics, plasma IVDr, metabolic phenotyping, diagnostic modelling, lipoproteins, lipids.

## Table of contents

|                                                                                                                                                                                     |     |
|-------------------------------------------------------------------------------------------------------------------------------------------------------------------------------------|-----|
| <b>Section 1 - Quantification of Plasma Lipoproteins</b>                                                                                                                            |     |
| Table S1 - Annotation of the keys used by the Bruker IVDr Lipoprotein Subclass Analysis (B.I.-LISA™) method.                                                                        | S4  |
| <b>Section 2 - Modeling no sepsis vs sepsis and septic shock patients</b>                                                                                                           |     |
| Figure S1 - Area under the ROC and PR curves for model 1 and model 2 using only C-reactive protein.                                                                                 | S7  |
| Figure S2 - O-PLS-DA and eruption plot for non-sepsis patients versus septic and septic shock patients for the amino acid and tryptophan pathway intermediates.                     | S8  |
| Table S2 - OPLS loadings, Cliff's delta and adjusted $p$ -values for the amino acid and tryptophan pathway intermediates for non-septic versus sepsis and septic shock.             | S8  |
| Figure S3 - O-PLS-DA for non sepsis patients versus sepsis and septic shock patients for the lipoproteins and eruption plot.                                                        | S9  |
| Table S3 - OPLS loadings, Cliff's delta and adjusted $p$ -values for the lipoproteins for no sepsis versus sepsis and septic shock.                                                 | S9  |
| Figure S4 - O-PLS-DA and eruption plot for non sepsis patients versus sepsis and septic shock patients for the glycoproteins and SPC.                                               | S11 |
| Table S4 - OPLS loadings, Cliff's delta and adjusted $p$ -values for the glycoprotein and SPC for no sepsis versus sepsis and septic shock.                                         | S11 |
| Figure S5 - Box plots of healthy controls, patients with no sepsis, patients with sepsis and patients with septic shock for the model 1 lipoproteins and neopterin.                 | S12 |
| <b>Section 3 - Modeling sepsis vs septic shock patients</b>                                                                                                                         |     |
| Figure S6 - O-PLS-DA and eruption plot for sepsis patients versus septic shock patients for the lipoproteins.                                                                       | S13 |
| Table S5 - OPLS loadings, Cliff's delta and adjusted $p$ -values for the lipoproteins of sepsis patients vs septic shock patients at baseline.                                      | S13 |
| Figure S7 - O-PLS-DA and eruption plot for sepsis versus septic shock patients for the lipids.                                                                                      | S15 |
| Table S6 - OPLS loadings, Cliff's delta and adjusted $p$ -values for the lipids of the sepsis patients versus septic shock patients.                                                | S15 |
| Figure S8 - O-PLS-DA for sepsis patients versus septic shock patients for the glycoproteins and SPC.                                                                                | S17 |
| Table S7 - OPLS loadings, Cliff's delta and adjusted $p$ -values for the glycoproteins and SPC of sepsis patients vs septic shock patients.                                         | S18 |
| <b>Section 4 - Glycoproteins and SPC</b>                                                                                                                                            |     |
| Figure S9 - Box plots of healthy controls, patients with no sepsis, patients with sepsis and patients with septic shock for the glycoproteins and SPC at 7 days post ICU admission. | S18 |
| Figure S10 - CRP and GlycA correlation                                                                                                                                              | S19 |

## Quantification of Plasma Lipoproteins

A total of 112 lipoprotein parameters were quantified based on 1D NMR experiments as part of Bruker's IVDr experiment suite for blood plasma. This approach is termed Bruker's IVDr lipoprotein class and subclass Analysis (B.I.-LISA™) and lipid analytes include cholesterol, free cholesterol, phospholipids, triglycerides, apolipoproteins A1/A2/B100 and ratio B100/A1, in total plasma concentration and resolved for main lipoprotein classes and subclasses. Main classes of plasma-lipoproteins were defined as: high-density lipoprotein (HDL, density 1.063–1.210 kg/L), low-density lipoprotein (LDL, density 1.019–1.063 kg/L), intermediate-density lipoprotein (IDL, density 1.006–1.019 kg/L) and very low-density lipoprotein (VLDL, 0.950–1.006 kg/L). The main lipoprotein classes HDL, LDL, VLDL are further divided into different lipoprotein subclasses: (LDL1: 1.019–1.031 kg/L, LDL2: 1.031–1.034 kg/L, LDL3: 1.034–1.037 kg/L, LDL4: 1.037–1.040 kg/L, LDL5: 1.040–1.044 kg/L, LDL6: 1.044–1.063 kg/L), and the HDL subfractions into four density classes (HDL1 1.063–1.100 kg/L, HDL2 1.100–1.125 kg/L, HDL3 1.112–1.125 kg/L, and HDL4 1.125–1.210 kg/L), the VLDL sub-fractions divided into 5 density classes.

**Table S1- Annotation of the keys used by the Bruker IVDr Lipoprotein Subclass Analysis (B.I.-LISA™) method.** Abbreviations: LDL – low-density lipoprotein; HDL – high-density lipoprotein; VLDL – very low-density lipoprotein; IDL – intermediate-density lipoprotein.

| Key  | Class/subclass                       | Compound                                | Concentration unit |
|------|--------------------------------------|-----------------------------------------|--------------------|
| TPTG | Total Plasma                         | Triglycerides                           | mg/dL              |
| TPCH | Total Plasma                         | Cholesterol                             | mg/dL              |
| LDCH | LDL                                  | Cholesterol                             | mg/dL              |
| HDCH | HDL                                  | Cholesterol                             | mg/dL              |
| TPA1 | Total Plasma                         | Apolipoprotein-A1                       | mg/dL              |
| TPA2 | Total Plasma                         | Apolipoprotein-A2                       | mg/dL              |
| TPAB | Total Plasma                         | Apolipoprotein-B100                     | mg/dL              |
| LDHD | Ratio LDL and HDL Cholesterol        | LDL Cholesterol / HDL Cholesterol       | -/-                |
| ABA1 | Ratio of Apolipoproteins A1 and B100 | Apolipoprotein-A1 / Apolipoprotein-B100 | -/-                |
| TBPN | Apolipoprotein-B100 particles        | carrying Particle Number                | nmol/L             |
| VLPN | VLDL                                 | Particle Number                         | nmol/L             |
| IDPN | IDL                                  | Particle Number                         | nmol/L             |
| LDPN | LDL                                  | Particle Number                         | nmol/L             |
| L1PN | LDL1                                 | Particle Number                         | nmol/L             |
| L2PN | LDL2                                 | Particle Number                         | nmol/L             |
| L3PN | LDL3                                 | Particle Number                         | nmol/L             |
| L4PN | LDL4                                 | Particle Number                         | nmol/L             |
| L5PN | LDL5                                 | Particle Number                         | nmol/L             |
| L6PN | LDL6                                 | Particle Number                         | nmol/L             |
| VLTG | VLDL Class                           | Triglycerides                           | mg/dL              |

|      |                |                     |       |
|------|----------------|---------------------|-------|
| IDTG | IDL Class      | Triglycerides       | mg/dL |
| LDTG | LDL Class      | Triglycerides       | mg/dL |
| HDTG | HDL Class      | Triglycerides       | mg/dL |
| VLCH | VLDL Class     | Cholesterol         | mg/dL |
| IDCH | IDL Class      | Cholesterol         | mg/dL |
| LDCH | LDL Class      | Cholesterol         | mg/dL |
| HDCH | HDL Class      | Cholesterol         | mg/dL |
| VLFC | VLDL Class     | Free Cholesterol    | mg/dL |
| IDFC | IDL Class      | Free Cholesterol    | mg/dL |
| LDFC | LDL Class      | Free Cholesterol    | mg/dL |
| HDFC | HDL Class      | Free Cholesterol    | mg/dL |
| VLPL | VLDL Class     | Phospholipids       | mg/dL |
| IDPL | IDL Class      | Phospholipids       | mg/dL |
| LDPL | LDL Class      | Phospholipids       | mg/dL |
| HDPL | HDL Class      | Phospholipids       | mg/dL |
| HDA1 | HDL Class      | Apolipoprotein-A1   | mg/dL |
| HDA2 | HDL Class      | Apolipoprotein-A2   | mg/dL |
| VLAB | VLDL Class     | Apolipoprotein-B100 | mg/dL |
| IDAB | IDL Class      | Apolipoprotein-B100 | mg/dL |
| LDAB | LDL Class      | Apolipoprotein-B100 | mg/dL |
| V1TG | VLDL1 Subclass | Triglycerides       | mg/dL |
| V2TG | VLDL2 Subclass | Triglycerides       | mg/dL |
| V3TG | VLDL3 Subclass | Triglycerides       | mg/dL |
| V4TG | VLDL4 Subclass | Triglycerides       | mg/dL |
| V5TG | VLDL5 Subclass | Triglycerides       | mg/dL |
| V1CH | VLDL1 Subclass | Cholesterol         | mg/dL |
| V2CH | VLDL2 Subclass | Cholesterol         | mg/dL |
| V3CH | VLDL3 Subclass | Cholesterol         | mg/dL |
| V4CH | VLDL4 Subclass | Cholesterol         | mg/dL |
| V5CH | VLDL5 Subclass | Cholesterol         | mg/dL |
| V1FC | VLDL1 Subclass | Free Cholesterol    | mg/dL |
| V2FC | VLDL2 Subclass | Free Cholesterol    | mg/dL |
| V3FC | VLDL3 Subclass | Free Cholesterol    | mg/dL |
| V4FC | VLDL4 Subclass | Free Cholesterol    | mg/dL |
| V5FC | VLDL5 Subclass | Free Cholesterol    | mg/dL |
| V1PL | VLDL1 Subclass | Phospholipids       | mg/dL |
| V2PL | VLDL2 Subclass | Phospholipids       | mg/dL |
| V3PL | VLDL3 Subclass | Phospholipids       | mg/dL |
| V4PL | VLDL4 Subclass | Phospholipids       | mg/dL |
| V5PL | VLDL5 Subclass | Phospholipids       | mg/dL |
| L1TG | LDL1 Subclass  | Triglycerides       | mg/dL |

|      |               |                     |       |
|------|---------------|---------------------|-------|
| L2TG | LDL2 Subclass | Triglycerides       | mg/dL |
| L3TG | LDL3 Subclass | Triglycerides       | mg/dL |
| L4TG | LDL4 Subclass | Triglycerides       | mg/dL |
| L5TG | LDL5 Subclass | Triglycerides       | mg/dL |
| L6TG | LDL6 Subclass | Triglycerides       | mg/dL |
| L1CH | LDL1 Subclass | Cholesterol         | mg/dL |
| L2CH | LDL2 Subclass | Cholesterol         | mg/dL |
| L3CH | LDL3 Subclass | Cholesterol         | mg/dL |
| L4CH | LDL4 Subclass | Cholesterol         | mg/dL |
| L5CH | LDL5 Subclass | Cholesterol         | mg/dL |
| L6CH | LDL6 Subclass | Cholesterol         | mg/dL |
| L1FC | LDL1 Subclass | Free Cholesterol    | mg/dL |
| L2FC | LDL2 Subclass | Free Cholesterol    | mg/dL |
| L3FC | LDL3 Subclass | Free Cholesterol    | mg/dL |
| L4FC | LDL4 Subclass | Free Cholesterol    | mg/dL |
| L5FC | LDL5 Subclass | Free Cholesterol    | mg/dL |
| L6FC | LDL6 Subclass | Free Cholesterol    | mg/dL |
| L1PL | LDL1 Subclass | Phospholipids       | mg/dL |
| L2PL | LDL2 Subclass | Phospholipids       | mg/dL |
| L3PL | LDL3 Subclass | Phospholipids       | mg/dL |
| L4PL | LDL4 Subclass | Phospholipids       | mg/dL |
| L5PL | LDL5 Subclass | Phospholipids       | mg/dL |
| L6PL | LDL6 Subclass | Phospholipids       | mg/dL |
| L1AB | LDL1 Subclass | Apolipoprotein-B100 | mg/dL |
| L2AB | LDL2 Subclass | Apolipoprotein-B100 | mg/dL |
| L3AB | LDL3 Subclass | Apolipoprotein-B100 | mg/dL |
| L4AB | LDL4 Subclass | Apolipoprotein-B100 | mg/dL |
| L5AB | LDL5 Subclass | Apolipoprotein-B100 | mg/dL |
| L6AB | LDL6 Subclass | Apolipoprotein-B100 | mg/dL |
| H1TG | HDL1 Subclass | Triglycerides       | mg/dL |
| H2TG | HDL2 Subclass | Triglycerides       | mg/dL |
| H3TG | HDL3 Subclass | Triglycerides       | mg/dL |
| H4TG | HDL4 Subclass | Triglycerides       | mg/dL |
| H1CH | HDL1 Subclass | Cholesterol         | mg/dL |
| H2CH | HDL2 Subclass | Cholesterol         | mg/dL |
| H3CH | HDL3 Subclass | Cholesterol         | mg/dL |
| H4CH | HDL4 Subclass | Cholesterol         | mg/dL |
| H1FC | HDL1 Subclass | Free Cholesterol    | mg/dL |
| H2FC | HDL2 Subclass | Free Cholesterol    | mg/dL |
| H3FC | HDL3 Subclass | Free Cholesterol    | mg/dL |
| H4FC | HDL4 Subclass | Free Cholesterol    | mg/dL |

|      |               |                   |       |
|------|---------------|-------------------|-------|
| H1PL | HDL1 Subclass | Phospholipids     | mg/dL |
| H2PL | HDL2 Subclass | Phospholipids     | mg/dL |
| H3PL | HDL3 Subclass | Phospholipids     | mg/dL |
| H4PL | HDL4 Subclass | Phospholipids     | mg/dL |
| H1A1 | HDL1 Subclass | Apolipoprotein-A1 | mg/dL |
| H2A1 | HDL2 Subclass | Apolipoprotein-A1 | mg/dL |
| H3A1 | HDL3 Subclass | Apolipoprotein-A1 | mg/dL |
| H4A1 | HDL4 Subclass | Apolipoprotein-A1 | mg/dL |
| H1A2 | HDL1 Subclass | Apolipoprotein-A2 | mg/dL |
| H2A2 | HDL2 Subclass | Apolipoprotein-A2 | mg/dL |
| H3A2 | HDL3 Subclass | Apolipoprotein-A2 | mg/dL |
| H4A2 | HDL4 Subclass | Apolipoprotein-A2 | mg/dL |

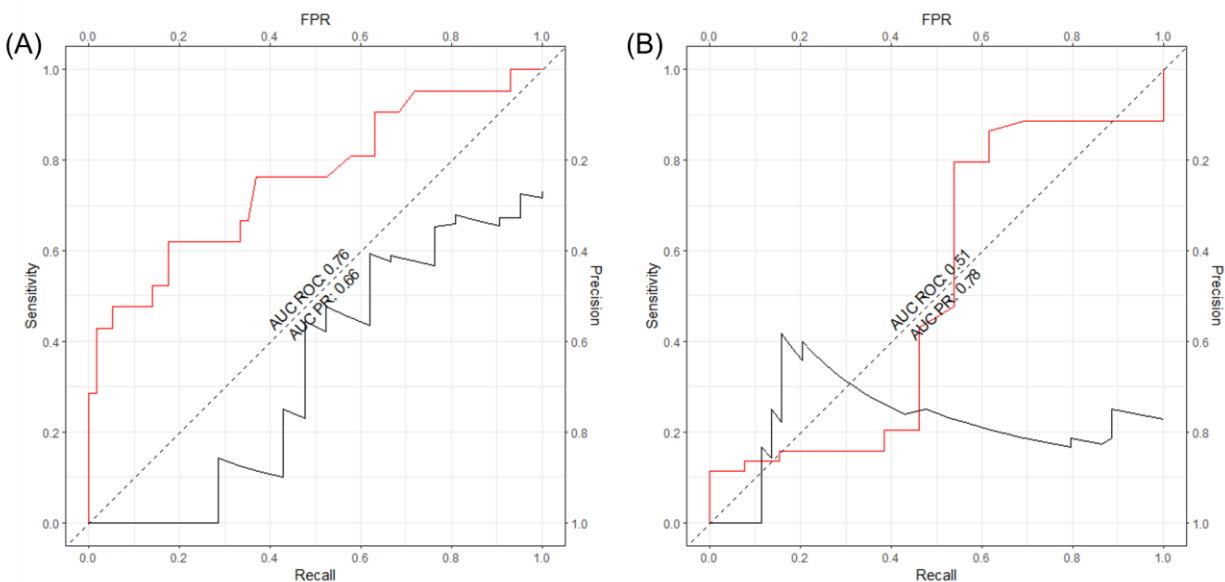

**Figure S1 - (A) Area under the ROC (red) and area under the PR curves (black) for no sepsis vs sepsis and septic shock patients using only C-reactive protein. (B) Area under the ROC (red) and area under the PR curves (black) for sepsis vs septic shock patients using only C-reactive protein. Samples included only up to 48 hours admission into ICU.**

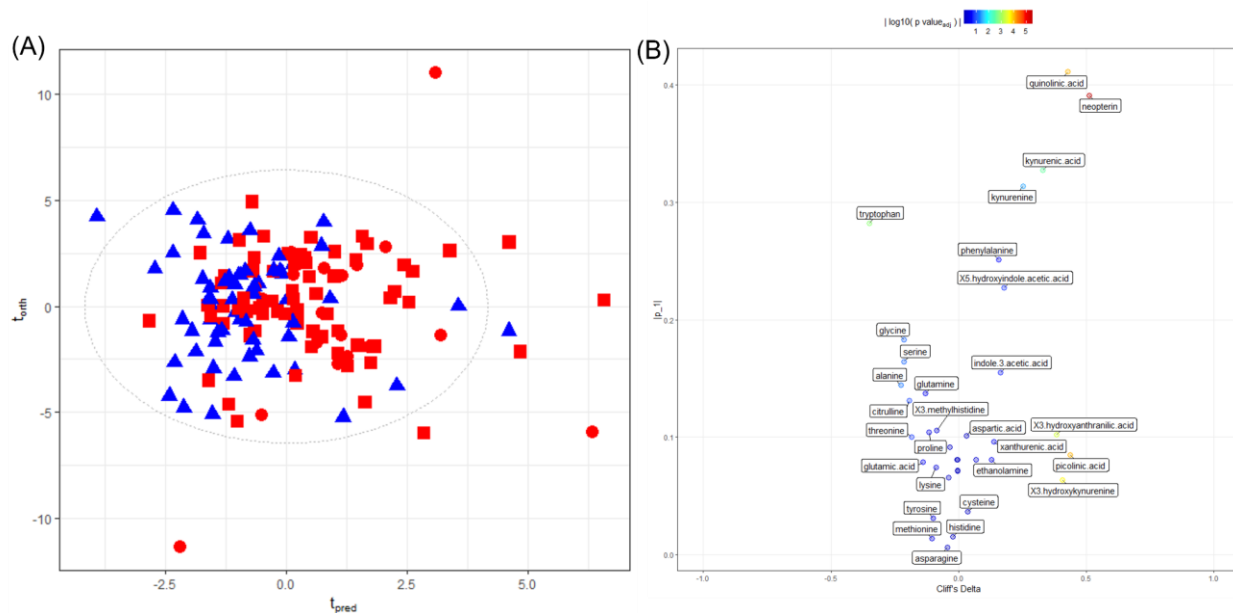

**Figure S2 - (A) O-PLS-DA for non sepsis patients (blue triangle) versus sepsis (red square) and septic shock patients (red circle) for the amino acid and tryptophan pathway intermediates ( $R^2X=0.13$ , CV-AUROC=0.66) and eruption plot. Eruption plots are formed from the Cliff's delta (abscissa) and O-PLS-DA loadings (ordinate). Coloured by significance. Samples collected within 48 hours of admission only.**

**Table S2 - OPLS loadings, Cliff's delta and adjusted  $p$ -values for the amino acid and tryptophan pathway intermediates for no sepsis versus sepsis and septic shock. Ordered by Cliff's delta, only the significant metabolites are shown.**

| Metabolite                | OPLS loadings | Cliff's delta | Adjusted $p$ -value   |
|---------------------------|---------------|---------------|-----------------------|
| Neopterin                 | 0.391         | 0.51          | $3.13 \times 10^{-6}$ |
| Picolinic acid            | 0.085         | 0.44          | $8.85 \times 10^{-5}$ |
| Quinolinic acid           | 0.411         | 0.43          | $9.27 \times 10^{-5}$ |
| 3-hydroxykynurenine       | 0.064         | 0.41          | $1.98 \times 10^{-4}$ |
| 3-hydroxyanthranilic acid | 0.102         | 0.38          | $4.48 \times 10^{-4}$ |
| Tryptophan                | 0.282         | -0.35         | $1.52 \times 10^{-3}$ |
| Kynurenic acid            | 0.327         | 0.33          | $2.97 \times 10^{-3}$ |
| Kynurenine                | 0.313         | 0.25          | $3.70 \times 10^{-2}$ |



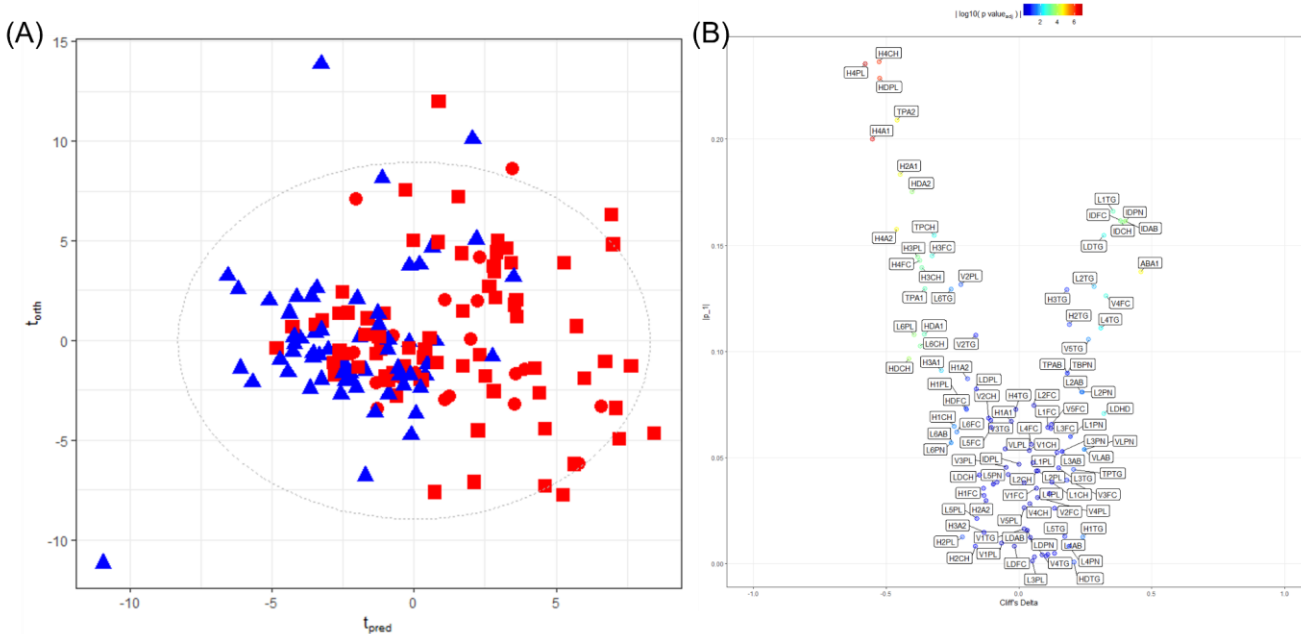

**Figure S3 - (A) O-PLS-DA for no sepsis patients (blue triangle) versus sepsis (red square) and septic shock patients (red circle) for the lipoproteins and (B) eruption plot. ( $R^2X=0.13$ , CV-AUROC=0.78). Eruption plots are formed from the Cliff's delta (abscissa) and O-PLS-DA loadings (ordinate). Coloured by significance. Samples collected within 48 hours of admission only.**

**Table S3 - OPLS loadings, Cliff's delta and adjusted  $p$ -values for the lipoproteins for no sepsis versus sepsis and septic shock. Ordered by Cliff's delta, only the significant metabolites are shown.**

| Metabolite | OPLS loadings | Cliff's delta | Adjusted $p$ -value   |
|------------|---------------|---------------|-----------------------|
| H4PL       | 0.235         | -0.58         | $1.09 \times 10^{-7}$ |
| H4A1       | 0.200         | -0.55         | $3.30 \times 10^{-7}$ |
| HDPL       | 0.229         | -0.53         | $8.84 \times 10^{-7}$ |
| H4CH       | 0.237         | -0.53         | $8.84 \times 10^{-7}$ |
| TPA2       | 0.209         | -0.46         | $2.23 \times 10^{-5}$ |
| ABA1       | 0.138         | 0.46          | $2.23 \times 10^{-5}$ |
| H4A2       | 0.158         | -0.46         | $2.23 \times 10^{-5}$ |
| H2A1       | 0.182         | -0.45         | $3.21 \times 10^{-5}$ |
| HDCH       | 0.097         | -0.41         | $1.55 \times 10^{-4}$ |
| HDA2       | 0.175         | -0.40         | $2.32 \times 10^{-4}$ |
| IDPN       | 0.161         | 0.40          | $2.33 \times 10^{-4}$ |
| IDAB       | 0.161         | 0.40          | $2.33 \times 10^{-4}$ |
| L6PL       | 0.108         | -0.39         | $2.58 \times 10^{-4}$ |
| IDCH       | 0.161         | 0.39          | $3.50 \times 10^{-4}$ |
| IDFC       | 0.162         | 0.38          | $2.33 \times 10^{-4}$ |
| H3PL       | 0.145         | -0.38         | $4.03 \times 10^{-4}$ |

|      |       |       |                       |
|------|-------|-------|-----------------------|
| L6CH | 0.103 | -0.37 | $5.03 \times 10^{-4}$ |
| H4FC | 0.143 | -0.37 | $5.06 \times 10^{-4}$ |
| H3CH | 0.139 | -0.37 | $6.52 \times 10^{-4}$ |
| TPA1 | 0.130 | -0.35 | $9.85 \times 10^{-4}$ |
| HDA1 | 0.108 | -0.36 | $9.85 \times 10^{-4}$ |
| L1TG | 0.166 | 0.35  | $1.02 \times 10^{-3}$ |
| V4FC | 0.126 | 0.33  | $2.61 \times 10^{-3}$ |
| H3FC | 0.145 | -0.33 | $2.61 \times 10^{-3}$ |
| TPCH | 0.155 | -0.32 | $3.26 \times 10^{-3}$ |
| LDTG | 0.155 | 0.32  | $3.26 \times 10^{-3}$ |
| LDHD | 0.071 | 0.32  | $3.26 \times 10^{-3}$ |
| L4TG | 0.111 | 0.31  | $4.60 \times 10^{-3}$ |
| H3A1 | 0.091 | -0.29 | $7.91 \times 10^{-3}$ |
| L2TG | 0.130 | 0.28  | $1.08 \times 10^{-2}$ |
| V5TG | 0.106 | 0.26  | $2.15 \times 10^{-2}$ |
| L6PN | 0.057 | -0.26 | $2.33 \times 10^{-2}$ |
| L6TG | 0.129 | -0.26 | $2.33 \times 10^{-2}$ |
| L6AB | 0.057 | -0.26 | $2.33 \times 10^{-2}$ |
| VLPN | 0.054 | 0.25  | $2.95 \times 10^{-2}$ |
| VLAB | 0.054 | 0.25  | $2.95 \times 10^{-2}$ |
| H1CH | 0.065 | -0.25 | $2.95 \times 10^{-2}$ |
| H1TG | 0.013 | 0.24  | $3.36 \times 10^{-2}$ |
| L2PN | 0.081 | 0.24  | $3.51 \times 10^{-2}$ |
| L6FC | 0.062 | -0.24 | $3.51 \times 10^{-2}$ |
| L2AB | 0.081 | 0.24  | $3.51 \times 10^{-2}$ |

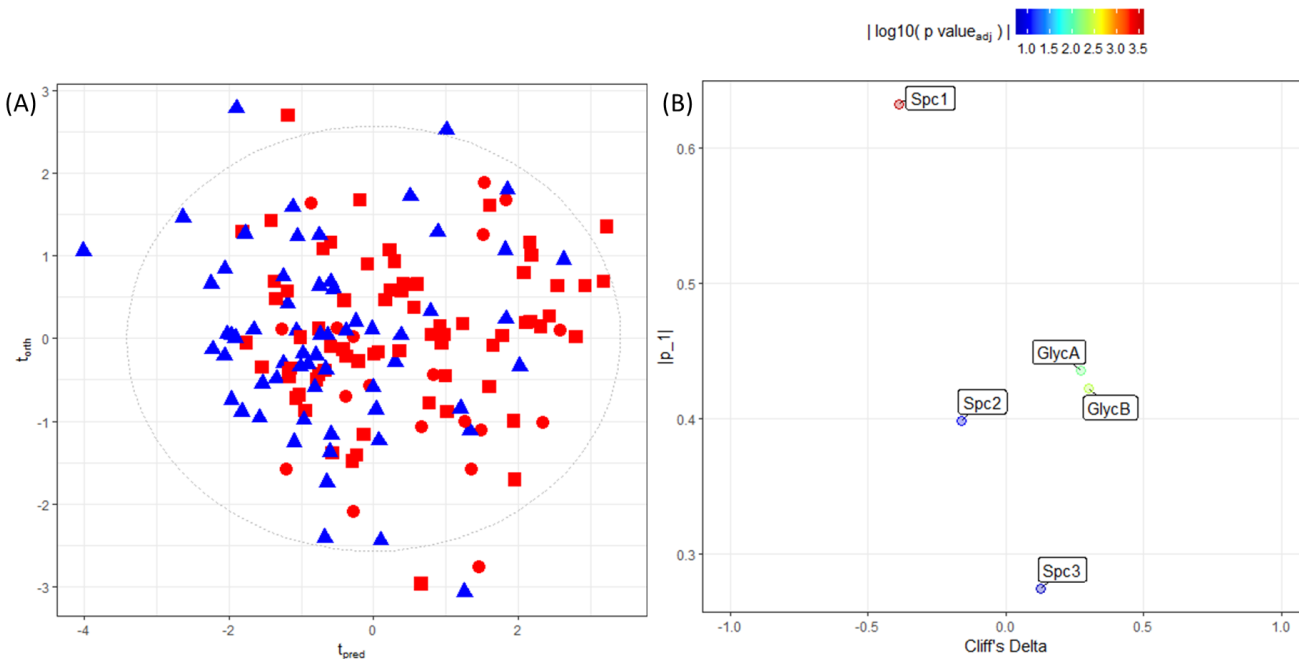

**Figure S4 - (A) O-PLS-DA for non sepsis patients (blue triangle) versus sepsis (red square) and septic shock patients (red circle) for the inflammatory markers (glycoproteins and SPC). ( $R^2X=0.56$ , CV-AUROC=0.68) (B) Eruption plot of the O-PLS-DA model. Eruption plots are formed from the Cliff's delta (abscissa) and O-PLS-DA loadings (ordinate). Coloured by significance. Samples collected within 48 hours of admission only.**

**Table S4 - OPLS loadings, Cliff's delta and adjusted  $p$ -values for the Glycoprotein and SPC for no sepsis versus sepsis and septic shock. Ordered by Cliff's delta.**

| Metabolite | OPLS loadings | Cliff's delta | Adjusted $p$ -value   |
|------------|---------------|---------------|-----------------------|
| SPC1       | 0.632         | -0.39         | $2.45 \times 10^{-4}$ |
| GlycB      | 0.422         | 0.30          | $4.04 \times 10^{-3}$ |
| GlycA      | 0.435         | 0.27          | $7.65 \times 10^{-3}$ |
| SPC2       | 0.398         | -0.16         | 0.11                  |
| SPC3       | 0.274         | 0.13          | 0.18                  |

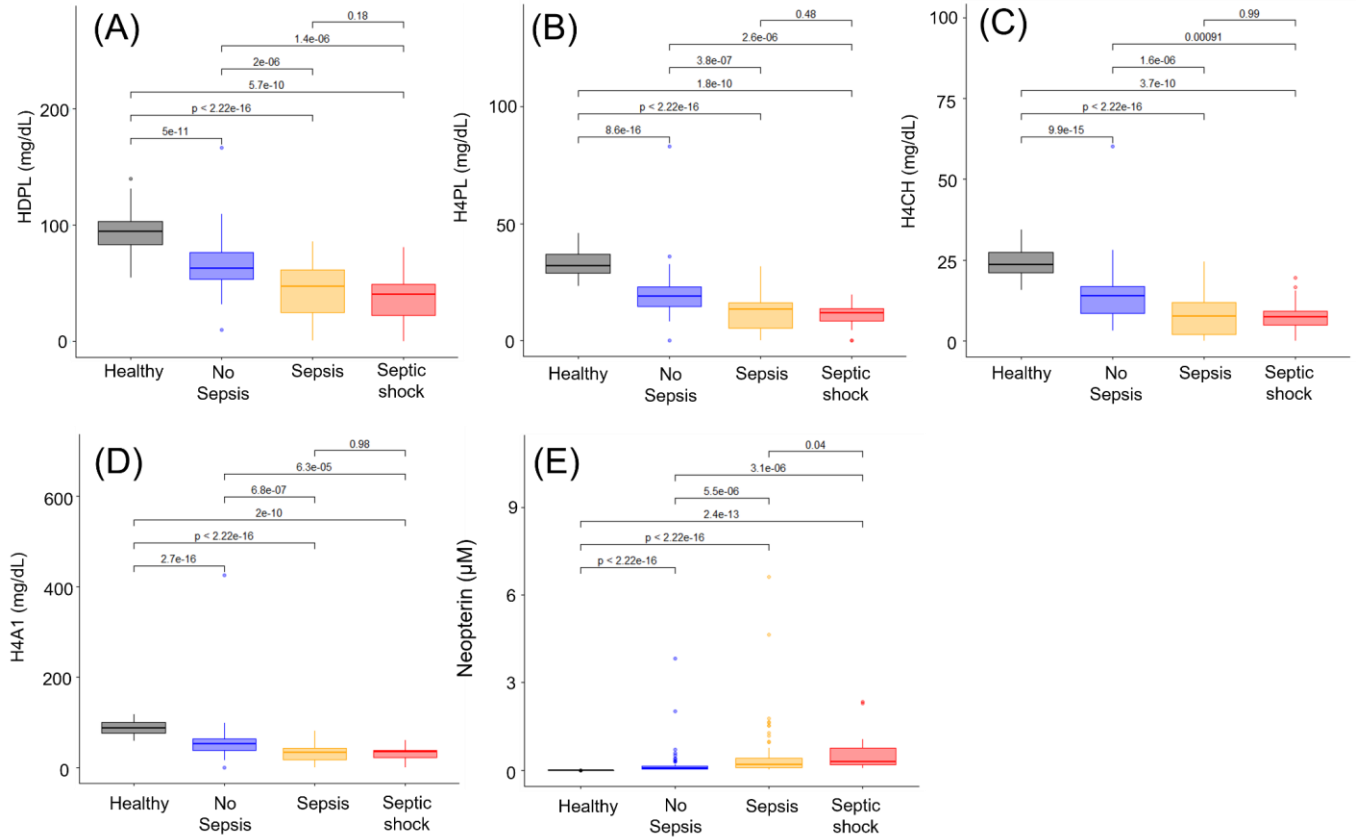

**Figure S5 - Box plots of healthy controls (black), patients with no sepsis (blue), patients with sepsis (yellow) and patients with septic shock (red) for the model 1 lipoproteins and neopterin from samples collected within 48 hours of admission into ICU. Significance levels from Mann-Whitney-U tests between the groups are shown above the corresponding plots.**

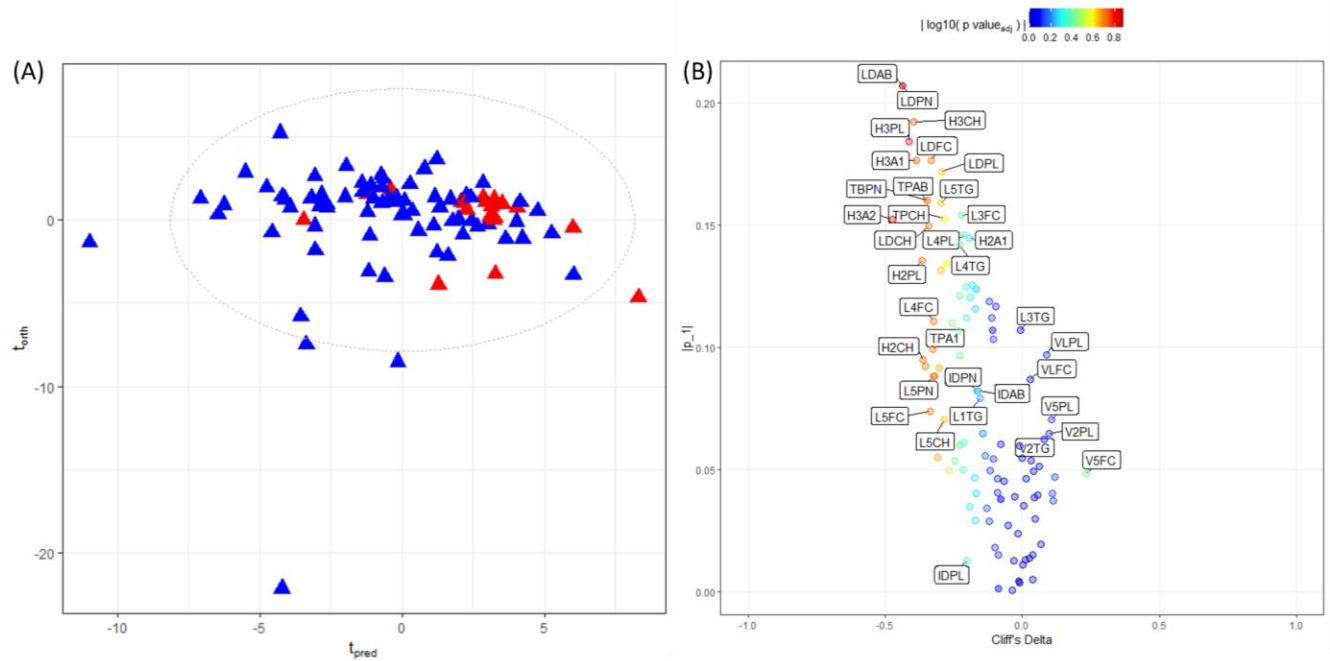

**Figure S6 - (A) O-PLS-DA for sepsis patients (blue) versus septic shock patients (red) for the lipoproteins.** ( $R^2X=0.15$ , AUROC=0.60) (B) Eruption plot of the O-PLS-DA model. Eruption plots are formed from the Cliff's delta (abscissa) and O-PLS-DA loadings (ordinate). Coloured by significance. Samples collected within 48 hours of admission only.

**Table S5 - OPLS loadings, Cliff's delta and adjusted  $p$ -values for the lipoproteins of sepsis patients vs septic shock patients at baseline.** Only those lipoproteins with a Cliff's delta below 0.25 are shown.

| Metabolite | OPLS loadings | Cliff's delta | Adjusted $p$ -value   |
|------------|---------------|---------------|-----------------------|
| H3A2       | 0.152         | -0.47         | $1.30 \times 10^{-1}$ |
| LDAB       | 0.207         | -0.44         | $1.30 \times 10^{-1}$ |
| LDPN       | 0.207         | -0.44         | $1.30 \times 10^{-1}$ |
| H3PL       | 0.184         | -0.41         | $1.62 \times 10^{-1}$ |
| H3CH       | 0.192         | -0.40         | $1.84 \times 10^{-1}$ |
| H3A1       | 0.177         | -0.39         | $1.84 \times 10^{-1}$ |
| H2PL       | 0.136         | -0.36         | $1.96 \times 10^{-1}$ |
| H2CH       | 0.095         | -0.36         | $1.96 \times 10^{-1}$ |
| HDA1       | 0.092         | -0.36         | $1.96 \times 10^{-1}$ |
| TPAB       | 0.160         | -0.35         | $1.96 \times 10^{-1}$ |
| TBPN       | 0.160         | -0.35         | $1.96 \times 10^{-1}$ |
| LDCH       | 0.150         | -0.34         | $1.96 \times 10^{-1}$ |
| L5FC       | 0.074         | -0.34         | $1.96 \times 10^{-1}$ |
| LDFC       | 0.177         | -0.33         | $1.96 \times 10^{-1}$ |
| TPA1       | 0.099         | -0.33         | $1.96 \times 10^{-1}$ |
| L5PN       | 0.088         | -0.32         | $1.96 \times 10^{-1}$ |

|      |       |       |                       |
|------|-------|-------|-----------------------|
| L4FC | 0.111 | -0.32 | $1.96 \times 10^{-1}$ |
| L5AB | 0.088 | -0.32 | $1.96 \times 10^{-1}$ |
| H3TG | 0.055 | -0.31 | $2.20 \times 10^{-1}$ |
| L5PL | 0.092 | -0.30 | $2.20 \times 10^{-1}$ |
| L5TG | 0.159 | -0.30 | $2.29 \times 10^{-1}$ |
| H3FC | 0.131 | -0.30 | $2.29 \times 10^{-1}$ |
| LDPL | 0.172 | -0.30 | $2.29 \times 10^{-1}$ |
| TPCH | 0.153 | -0.29 | $2.55 \times 10^{-1}$ |
| L5CH | 0.070 | -0.28 | $2.29 \times 10^{-1}$ |
| L4AB | 0.134 | -0.28 | $2.67 \times 10^{-1}$ |
| L4PN | 0.134 | -0.28 | $2.67 \times 10^{-1}$ |
| H2TG | 0.050 | -0.27 | $2.97 \times 10^{-1}$ |
| H2FC | 0.110 | -0.25 | $3.47 \times 10^{-1}$ |
| HDTG | 0.054 | -0.25 | $3.80 \times 10^{-1}$ |

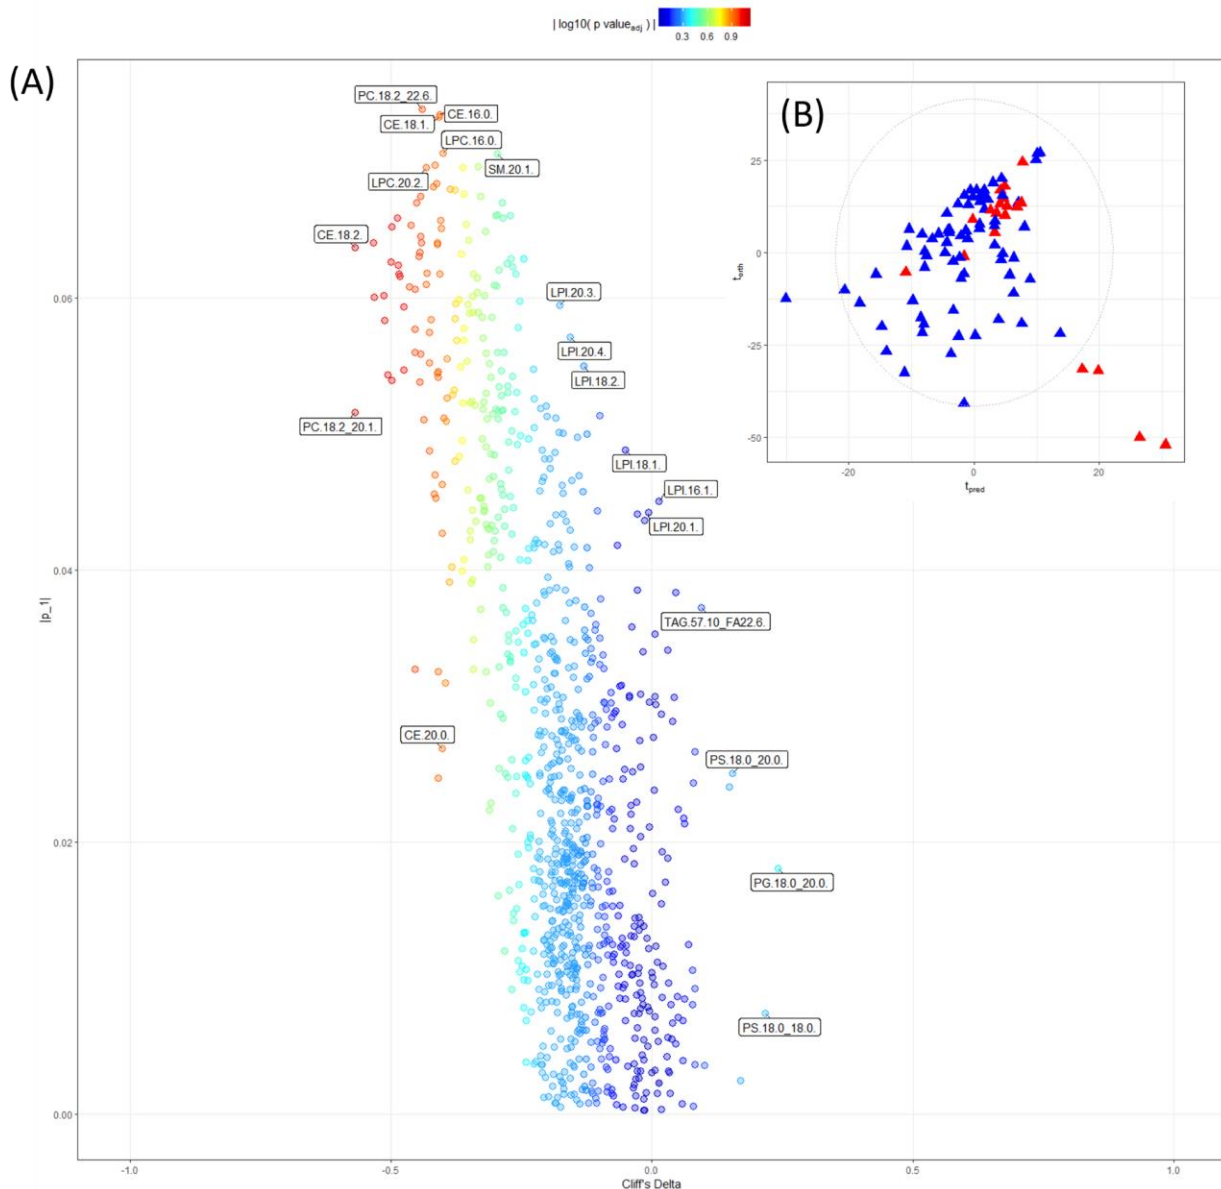

**Figure S7 - (B) O-PLS-DA for sepsis patients (blue) versus septic shock patients (red) for the lipids.** ( $R^2X=0.18$ , AUROC=0.68) (A) Eruption plot of the O-PLS-DA model. Eruption plots are formed from the Cliff's delta (abscissa) and O-PLS-DA loadings (ordinate). Coloured by significance. Samples collected within 48 hours of admission only.

**Table S6 - OPLS loadings, Cliff's delta and adjusted  $p$ -values for the lipids of sepsis patients vs septic shock patients at baseline.** Only those lipids with a Cliff's delta below -0.4 are shown.

| Metabolite     | OPLS loadings | Cliff's delta | Adjusted $p$ -value   |
|----------------|---------------|---------------|-----------------------|
| CE (18:2)      | 0.064         | -0.57         | $7.30 \times 10^{-2}$ |
| PC (18:2/20:1) | 0.052         | -0.57         | $7.30 \times 10^{-2}$ |
| CE (20:3)      | 0.064         | -0.53         | $8.56 \times 10^{-2}$ |

|                  |       |       |                       |
|------------------|-------|-------|-----------------------|
| PC (16:0/20:2)   | 0.060 | -0.53 | 8.56x10 <sup>-2</sup> |
| PC (20:0/20:3)   | 0.060 | -0.51 | 8.56x10 <sup>-2</sup> |
| PE.P (18:0/20:5) | 0.058 | -0.51 | 8.56x10 <sup>-2</sup> |
| DCER (26:1)      | 0.054 | -0.51 | 8.56x10 <sup>-2</sup> |
| PC (18:2/20:3)   | 0.063 | -0.50 | 8.56x10 <sup>-2</sup> |
| CE (18:0)        | 0.054 | -0.50 | 8.56x10 <sup>-2</sup> |
| PC (18:0/20:3)   | 0.065 | -0.50 | 8.56x10 <sup>-2</sup> |
| PI (20:0/18:2)   | 0.066 | -0.49 | 8.98x10 <sup>-2</sup> |
| CE (20:2)        | 0.062 | -0.49 | 8.98x10 <sup>-2</sup> |
| PE.P (18:0/20:3) | 0.062 | -0.48 | 8.98x10 <sup>-2</sup> |
| PC (16:0/20:3)   | 0.062 | -0.48 | 8.98x10 <sup>-2</sup> |
| PE.O (16:0/20:5) | 0.055 | -0.48 | 9.33x10 <sup>-2</sup> |
| PE.P (18:1/20:3) | 0.061 | -0.46 | 1.06x10 <sup>-1</sup> |
| SM (24:1)        | 0.065 | -0.46 | 1.06x10 <sup>-1</sup> |
| CE (20:5)        | 0.056 | -0.45 | 1.06x10 <sup>-1</sup> |
| PC (20:0/20:2)   | 0.058 | -0.45 | 1.06x10 <sup>-1</sup> |
| PE.P (18:0/20:4) | 0.061 | -0.45 | 1.06x10 <sup>-1</sup> |
| PG (18:2/20:4)   | 0.033 | -0.45 | 1.06x10 <sup>-1</sup> |
| PC (18:0/20:2)   | 0.067 | -0.45 | 1.06x10 <sup>-1</sup> |
| PC (18:1/22:5)   | 0.063 | -0.45 | 1.06x10 <sup>-1</sup> |
| PC (18:1/20:5)   | 0.054 | -0.44 | 1.06x10 <sup>-1</sup> |
| PC (18:2/22:5)   | 0.063 | -0.44 | 1.06x10 <sup>-1</sup> |
| CE (22:5)        | 0.065 | -0.44 | 1.06x10 <sup>-1</sup> |
| PC (18:1/22:6)   | 0.067 | -0.44 | 1.06x10 <sup>-1</sup> |
| PC (20:0/20:4)   | 0.056 | -0.44 | 1.06x10 <sup>-1</sup> |
| PC (18:2/20:4)   | 0.064 | -0.44 | 1.06x10 <sup>-1</sup> |
| PC (18:2/22:6)   | 0.074 | -0.44 | 1.06x10 <sup>-1</sup> |
| CER (26:0)       | 0.051 | -0.44 | 1.10x10 <sup>-1</sup> |
| LPC (20:2)       | 0.070 | -0.43 | 1.13x10 <sup>-1</sup> |
| PC (20:0/22:5)   | 0.061 | -0.43 | 1.14x10 <sup>-1</sup> |
| CE (18:3)        | 0.062 | -0.43 | 1.14x10 <sup>-1</sup> |
| PC (14:0/20:5)   | 0.057 | -0.43 | 1.15x10 <sup>-1</sup> |
| PE.P (16:0/20:5) | 0.055 | -0.43 | 1.15x10 <sup>-1</sup> |
| PI (20:0/18:1)   | 0.049 | -0.43 | 1.15x10 <sup>-1</sup> |
| PC (18:2/20:5)   | 0.058 | -0.42 | 1.17x10 <sup>-1</sup> |
| LPC (14:0)       | 0.068 | -0.42 | 1.17x10 <sup>-1</sup> |
| PE (18:2/16:1)   | 0.046 | -0.42 | 1.17x10 <sup>-1</sup> |
| CE (14:0)        | 0.047 | -0.42 | 1.17x10 <sup>-1</sup> |
| LPC (18:0)       | 0.070 | -0.42 | 1.17x10 <sup>-1</sup> |
| PS (18:0/20:4)   | 0.045 | -0.41 | 1.17x10 <sup>-1</sup> |



|                  |       |       |                       |
|------------------|-------|-------|-----------------------|
| LPC (20:0)       | 0.068 | -0.41 | $1.17 \times 10^{-1}$ |
| PC (18:2/18:2)   | 0.064 | -0.41 | $1.17 \times 10^{-1}$ |
| PE.P (18:0/22:5) | 0.054 | -0.41 | $1.17 \times 10^{-1}$ |
| SM (24:0)        | 0.064 | -0.41 | $1.17 \times 10^{-1}$ |
| CE (24:0)        | 0.033 | -0.41 | $1.17 \times 10^{-1}$ |
| DAG (20:0/20:0)  | 0.025 | -0.41 | $1.17 \times 10^{-1}$ |
| PE.P (16:0/20:3) | 0.055 | -0.41 | $1.17 \times 10^{-1}$ |
| PS (20:0/20:5)   | 0.054 | -0.41 | $1.17 \times 10^{-1}$ |
| CE (18:1)        | 0.073 | -0.41 | $1.18 \times 10^{-1}$ |
| CE (16:0)        | 0.073 | -0.41 | $1.18 \times 10^{-1}$ |
| PE.P (16:0/20:1) | 0.062 | -0.41 | $1.18 \times 10^{-1}$ |
| LPC (20:3)       | 0.066 | -0.41 | $1.19 \times 10^{-1}$ |
| PI (20:0/20:4)   | 0.065 | -0.40 | $1.20 \times 10^{-1}$ |
| CE (20:0)        | 0.027 | -0.40 | $1.20 \times 10^{-1}$ |
| PC (18:0/18:2)   | 0.046 | -0.40 | $1.20 \times 10^{-1}$ |
| PE.P (14:0/18:1) | 0.043 | -0.40 | $1.20 \times 10^{-1}$ |
| LPC (16:0)       | 0.071 | -0.40 | $1.20 \times 10^{-1}$ |
| CE (16:1)        | 0.051 | -0.40 | $1.21 \times 10^{-1}$ |
| CE (22:0)        | 0.032 | -0.40 | $1.30 \times 10^{-1}$ |

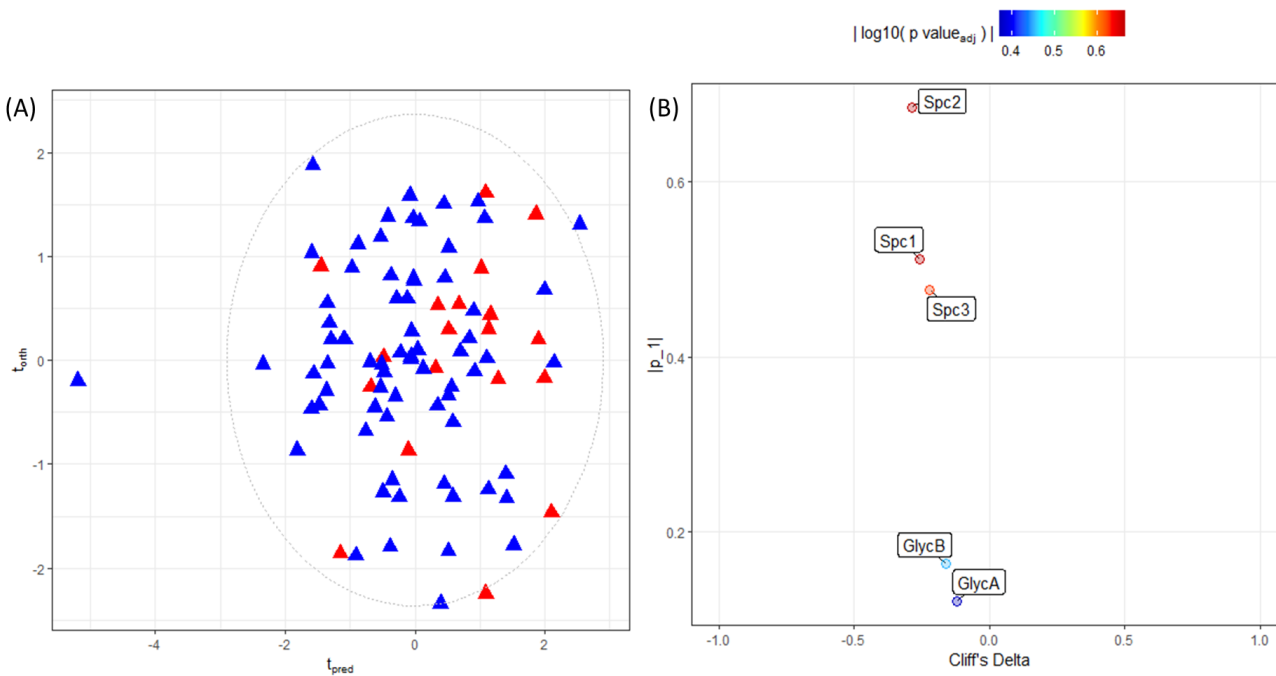

**Figure S8 - (A) O-PLS-DA for sepsis patients (blue) versus septic shock patients (red) for the glycoproteins and SPC. ( $R^2X=0.46$ , AUROC=0.63) (B) Eruption plot of the O-PLS-DA model. Eruption plots are formed from the**

Cliff's delta (abscissa) and O-PLS-DA loadings (ordinate). Coloured by significance. Samples collected within 48 hours of admission only.

**Table S7 - OPLS loadings, Cliff's delta and adjusted *p*-values for the glycoproteins and SPC of sepsis patients vs septic shock patients at baseline.**

| Metabolite | OPLS loadings | Cliff's delta | Adjusted <i>p</i> -value |
|------------|---------------|---------------|--------------------------|
| SPC2       | 0.685         | -0.29         | 0.24                     |
| SPC1       | 0.512         | -0.26         | 0.22                     |
| SPC3       | 0.477         | -0.22         | 0.24                     |
| GlycB      | 0.163         | -0.16         | 0.35                     |
| GlycA      | 0.121         | -0.12         | 0.43                     |

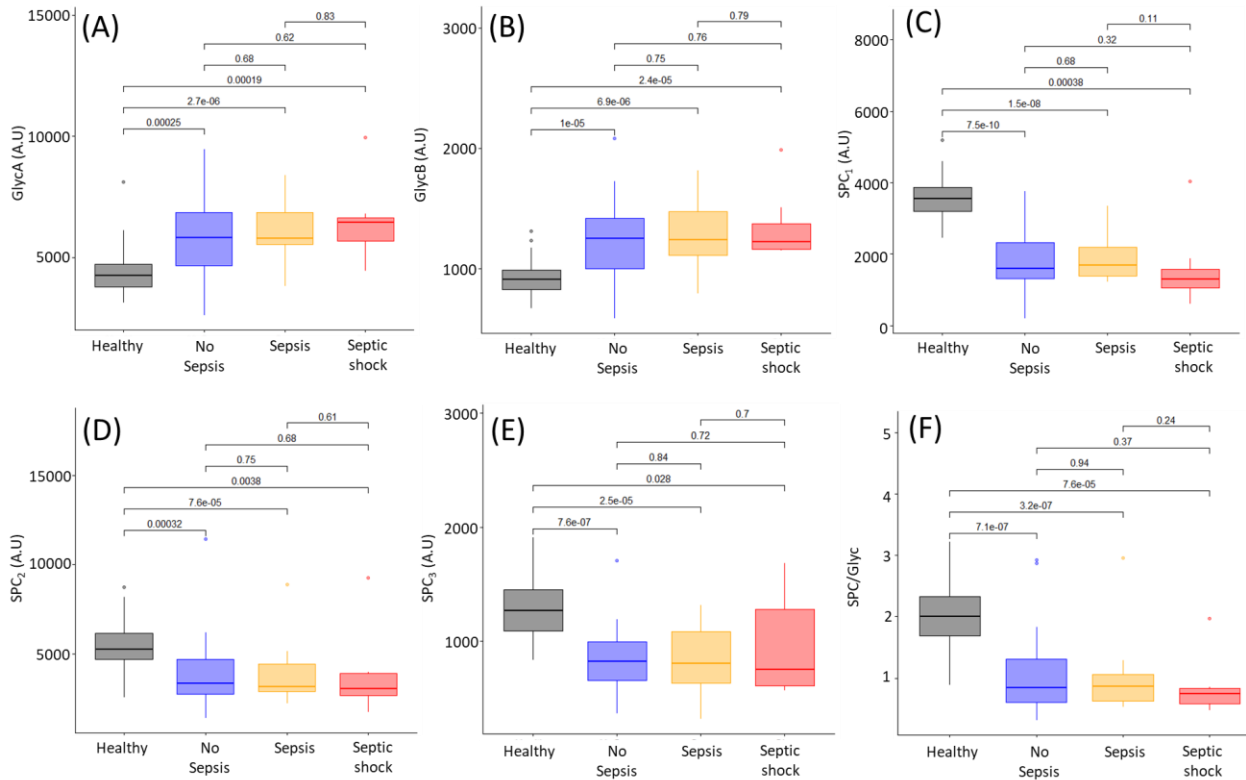

**Figure S9 - Box plots of healthy controls (black), patients with no sepsis (blue), patients with sepsis (yellow) and patients with septic shock (red) for the glycoproteins and SPC at 7 days post ICU admission. Significance levels from Mann Whitney-U tests between the groups are shown above the corresponding plots.**

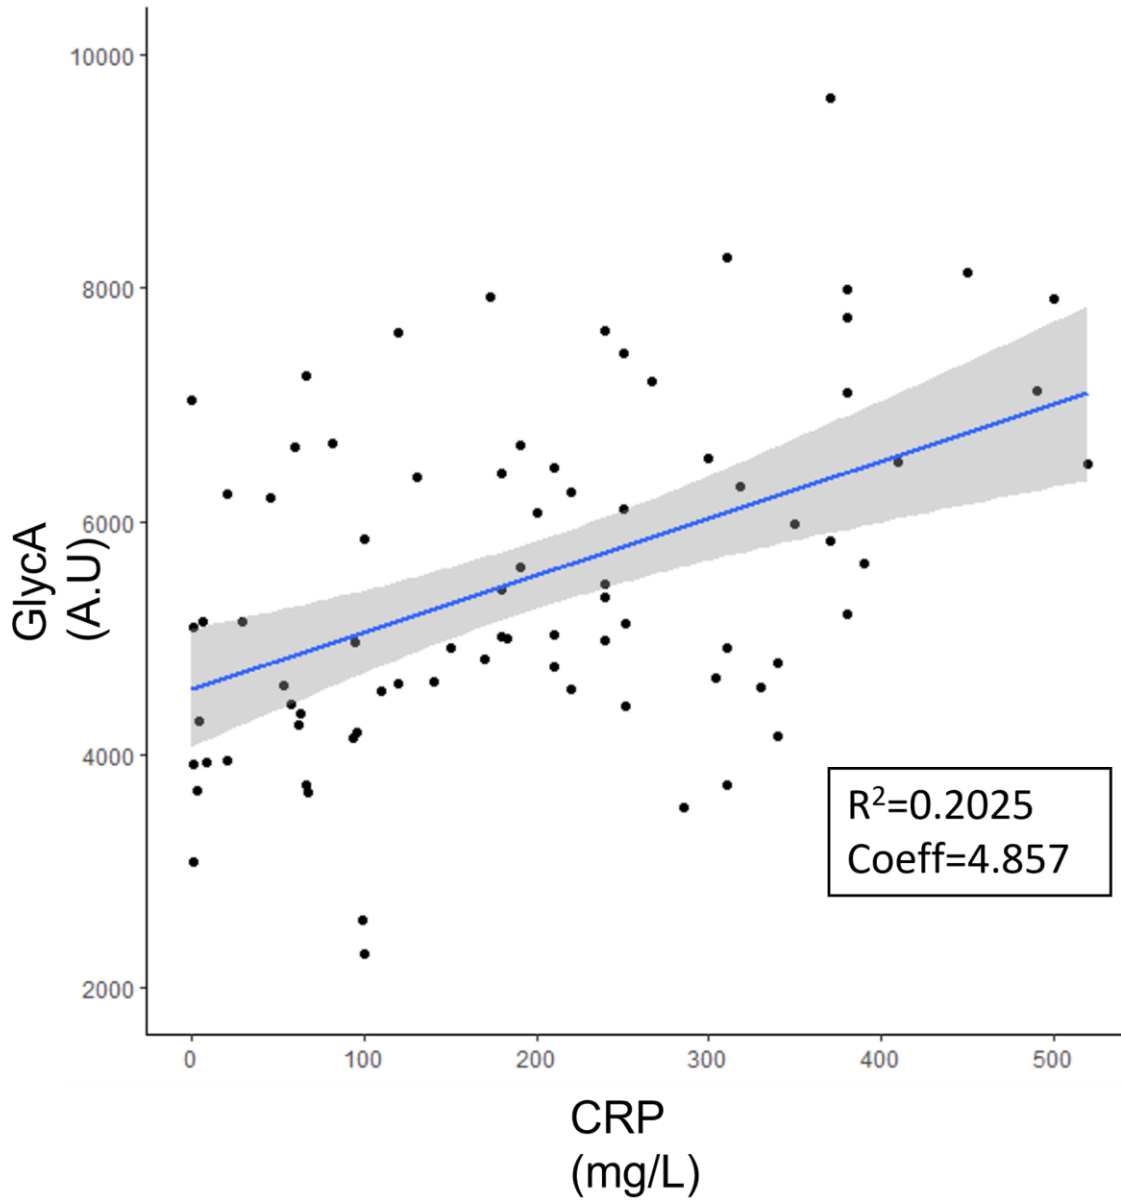

Figure S10 - CRP and GlycA correlation. Samples collected within 48 hours of admission into ICU only.
